# Supplementary material
Source: MDPI journal article supplement (https://www.mdpi.com/2073-445X/10/12/1364)
Supplement: s1 [file s1]

**Table S1.** Surface soil properties of the study area. Data shown as mean  $\pm$ SD, (n = 5).

| Sampling areas | Soil type | pH               |
|----------------|-----------|------------------|
| X1             | Sierozem  | 8.07 $\pm$ 0.16  |
| X2             |           | 7.75 $\pm$ 0.05  |
| X3             |           | 8.25 $\pm$ 0.36  |
| X4             |           | 7.94 $\pm$ 0.11  |
| X5             |           | 7.89 $\pm$ 0.13  |
| D1             |           | 8.31 $\pm$ 0.25  |
| D2             |           | 8.14 $\pm$ 0.09  |
| D3             |           | 7.95 $\pm$ 0.16  |
| D4             |           | 8.12 $\pm$ 0.11. |
| D5             |           | 8.08 $\pm$ 0.13  |
| H1             |           | 8.68 $\pm$ 0.12  |
| H2             |           | 8.31 $\pm$ 0.08  |
| H3             |           | 7.94 $\pm$ 0.07  |
| H4             |           | 8.26 $\pm$ 0.11  |
| H5             |           | 8.27 $\pm$ 0.08  |
